# Supplementary material for: Proposed New MRI Scoring System of Rectosigmoid Endometriosis to Guide Operative Planning
Source: Research Square preprint supplement (doi:10.21203/rs.3.rs-6336241/v1), 2025-05-05
Supplement: Supplementary file 1 [file 4a25ca802275c8078e10f49b.docx]

**Tables**

**Table 1. MRI Protocol for Endometriosis**

| Sequence | Plane | Thickness (mm) | Comments |
| --- | --- | --- | --- |
| T2WI TSE without fat suppression | Axial, sagittal and coronal | 3-5 mm (axial), 4 mm (sagittal and coronal) |  |
| T1WI in-phase and out-of-phase GRE or Dixon | Axial | 5 mm |  |
| T1WI with fat suppression without intravenous contrast material | Axial and sagittal | 3 mm (axial), 3-4 mm (sagittal) |  |
| T1WI with intravenous contrast material | Axial and sagittal | 3 mm (axial), 3-4 mm (sagittal) |  |
| Diffusion-weighted imaging | Axial | 4-5 mm | b value = 0, 50, 1000 sec/mm2 |
| T2WI fast spine echo with fat saturation | Axial |  |  |
| T2WI echo-planar fast spine echo | Axial |  | Large FOV to include kidneys |

FOV: field of view, GRE: gradient echo, T1WI: T1 weighted imaging, T2WI: T2 weighted imaging

**Table 2. Patient and Lesion Characteristics**

|  | Total | Case (w/ RSE surgery) | Control (w/o RSE surgery) |
| --- | --- | --- | --- |
| Patient number | 95 | 77 | 18 |
| Age [years] † | 36 (20 to 54) | 37 (22 to 54) | 32 (20 to 44) |
| Interval between MRI and endometriosis surgery [days] † | 75 (6 to 177) | 76 (6 to 177) | 72 (10 to 162) |
| MRI score (reference) [number]  MRI score 0  MRI score 1  MRI score 2  MRI score 3 | 16  14  30  35 | 2  10  30  35 | 14  4  0  0 |
| Types of surgery [number]  Segmental resection   - Low anterior resection - Sigmoidectomy   Full thickness discoid resection  Partial thickness discoid resection | 41  32  9  7  29 | 41  32  9  7  29 | N/A  N/A  N/A  N/A  N/A |
| Depth of invasion (for patients who underwent segmental resection or full thickness discoid resection only) [number]  Submucosa/mucosa  Muscularis propria  Serosa  No involvement | 24  21  1  2 | 24  21  1  2 | N/A  N/A  N/A  N/A |

†median (minimum to maximum)

**Table 3. Comparison of MRI Scores Between the Reader Study and the Reference Score in the Per-patient Reader study**

| Reference score | MRI score 0 | MRI score 1 | MRI score 2 | MRI score 3 |
| --- | --- | --- | --- | --- |
| Reader 1 | | | | |
| MRI score 0 | 5 | 2 | 1† | 1† |
| MRI score 1 | 11 | 7 | 5 | 1† |
| MRI score 2 | 0 ***** | 4 | 13 | 6 |
| MRI score 3 | 0 ***** | 1 ***** | 11 | 27 |
| Reader 2 | | | | |
| MRI score 0 | 7 | 1 | 0† | 0† |
| MRI score 1 | 8 | 7 | 5 | 0† |
| MRI score 2 | 1 ***** | 6 | 13 | 3 |
| MRI score 3 | 0 ***** | 0 ***** | 12 | 32 |

†Under-call case: the cases with reader’s score 2 or more lower than the reference score. ***** Over-call cases: the cases with reader’s score 2 or more higher than the reference score.

**Table 4. Quantitative Parameters Measured by Three Readers in the Per-lesion Reader study**

|  | Reader X | Reader Y | Reader Z | Interreader agreement** |
| --- | --- | --- | --- | --- |
| Length (mm)  Reference MRI score 1†  Reference MRI score 2†  Reference MRI score 3†  P value – difference among MRI scores* | 4.5 (0-7)  10 (2-50)  31 (3-66)  <0.001 | 0 (0-33)  21 (0-78)  30 (0-72)  <0.001 | 10.5 (4-33)  25.5 (6-100)  41 (11-72)  <0.001 | 0.59 |
| Transverse (mm)  Reference MRI score 1†  Reference MRI score 2†  Reference MRI score 3†  P value – difference among MRI scores* | 3 (0-9)  11 (3-27)  18 (5-31)  <0.001 | 0 (0-13)  7 (0-25)  12 (0-29)  <0.001 | 8.5 (4-27)  13.5 (5-40)  22 (8-46)  <0.001 | 0.42 |
| Thickness (mm)  Reference MRI score 1†  Reference MRI score 2†  Reference MRI score 3†  P value – difference among MRI scores* | 0 (0-11)  8 (3-21)  14 (5-29)  <0.001 | 0(0-12)  4 (0-19)  11 (0-17)  <0.001 | 8 (4-22)  15 (6-64)  25 (11-49)  <0.001 | 0.31 |

†median (minimum to maximum). * The differences of values among MRI scores 1, 2, and 3 were assessed by one-way Analysis of Variance. P<0.05 was considered statistically significant. ** Interreader agreement was assessed by intraclass correlation.
